# Field Evolved Resistance in *Helicoverpa armigera* (Lepidoptera: Noctuidae) to *Bacillus thuringiensis* Toxin Cry1Ac in Pakistan

Anwaar H. K. Alvi<sup>1,2</sup>, Ali H. Sayyed<sup>2\*</sup>, Muhammad Naeem<sup>1</sup>, Muhammad Ali<sup>2</sup>

**1** Department of Entomology, PMAS Arid Agriculture University, Rawalpindi, Pakistan, **2** Institute of Molecular Biology & Biotechnology, Bahauddin Zakariya University, Multan, Pakistan

## Abstract

*Helicoverpa armigera* (Hübner) is one of the most destructive pests of several field and vegetable crops, with indiscriminate use of insecticides contributing to multiple instances of resistance. In the present study we assessed whether *H. armigera* had developed resistance to Bt cotton and compared the results with several conventional insecticides. Furthermore, the genetics of resistance was also investigated to determine the inheritance to Cry1Ac resistance. To investigate the development of resistance to Bt cotton, and selected foliar insecticides, *H. armigera* populations were sampled in 2010 and 2011 in several cotton production regions in Pakistan. The resistance ratios (RR) for Cry1Ac, chlorpyrifos, profenofos, cypermethrin, spinosad, indoxacarb, abamectin and deltamethrin were 580-fold, 320-, 1110-, 1950-, 200-, 380, 690, and 40-fold, respectively, compared with the laboratory susceptible (Lab-PK) population. Selection of the field collected population with Cry1Ac in 2010 for five generations increased RR to 5440-fold. The selection also increased RR for deltamethrin, chlorpyrifos, profenofos, cypermethrin, spinosad, indoxacarb, abamectin to 125-folds, 650-, 2840-, 9830-, 370-, 3090-, 1330-fold. The estimated LC<sub>50</sub>s for reciprocal crosses were 105 µg/ml (Cry1Ac-SEL female × Lab-PK male) and 81 g µg/ml (Lab-PK female × Cry1Ac-SEL male) suggesting that the resistance to Cry1Ac was autosomal; the degree of dominance (D<sub>LC</sub>) was 0.60 and 0.57 respectively. Mixing of enzyme inhibitors significantly decreased resistance to Cry1Ac suggesting that the resistance to Cry1Ac and other insecticides tested in the present study was primarily metabolic. Resistance to Cry1Ac was probably due to a single but unstable factor suggesting that crop rotation with non-Bt cotton or other crops could reduce the selection pressure for *H. armigera* and improve the sustainability of Bt cotton.

**Citation:** Alvi AHK, Sayyed AH, Naeem M, Ali M (2012) Field Evolved Resistance in *Helicoverpa armigera* (Lepidoptera: Noctuidae) to *Bacillus thuringiensis* Toxin Cry1Ac in Pakistan. PLoS ONE 7(10): e47309. doi:10.1371/journal.pone.0047309

**Editor:** Alejandra Bravo, Universidad Nacional Autonoma de Mexico, Instituto de Biotecnologia, Mexico

**Received:** May 10, 2012; **Accepted:** September 11, 2012; **Published:** October 15, 2012

**Copyright:** © 2012 Alvi et al. This is an open-access article distributed under the terms of the Creative Commons Attribution License, which permits unrestricted use, distribution, and reproduction in any medium, provided the original author and source are credited.

**Funding:** These studies were part of PhD work by the first author, and sincere thanks are due to the Higher Education Commission of Pakistan for granting a PhD Merit Scholarship to carry out studies at PMAS Arid University, Rawalpindi/BZU, Multan Pakistan and an IRSIP (International Research Support Initiative Program) fellowship for studies at the University of Sussex, UK. The funders had no role in study design, data collection and analysis, decision to publish, or preparation of the manuscript.

**Competing Interests:** The authors have declared that no competing interests exist.

\* E-mail: ali\_sayyed@outlook.com

## Introduction

The cotton bollworm, *Helicoverpa armigera* (Hübner) (Noctuidae), is one of the most damaging and cosmopolitan pests causing significant economic loss to a wide range of field and vegetable crops [1]. Due to its wider host range, high fecundity, multiple generations, migratory behavior and insecticide resistance, it has become a much more difficult pest to manage [2]. The frequent and indiscriminate use of insecticides has resulted in the development of resistance in many insect populations [3,4]. Resistance to a wide range of insecticides in *H. armigera* has been reported world-wide, including Pakistan [2]. Moderate to high levels of resistance to pyrethroid and organo-phosphate insecticides was previously reported in a field population of *H. armigera* [5].

Selection for resistance to insecticides in the laboratory is an example of natural selection, and the factors responsible for the cause and increase of resistance-associated mutations are of applied importance. Most of the targets for insecticides are important receptors or enzymes in the insect nervous system,

where, poisoning leads to rapid paralysis and insect death. The number of genes selected for resistance depends on whether selection acts within or outside of the phenotypic distribution of the susceptible population [6]. Selection from within this distribution selects preferentially for polygenic resistance, by combining common pre-existing resistance factors that have a minor effect, such as body size and have a major effect. To overcome resistance and to sustain cotton production, the agrochemical industry has recently introduced new chemistries with novel modes of action [7]. Importantly the introduction of *Bacillus thuringiensis* (*Bt*) cotton has revolutionized cotton production globally. However, Bt cotton may not be the optimal solution for all pest problems, owing to the highly specific mode of action of individual Cry toxins against target pests [8]. Without proper resistance management strategies the life expectancy of this technology is likely to be short lived. The High-Dose, Refuge (HDR) strategy, which requires farmers to grow non *Bt* crops near *Bt* crops, can be deployed as either a separate refuge, in which 20% of the field is planted with non-transgenic plants that can be

treated with a non-*Bt* foliar insecticide, or as a 4% refuge of non-transgenic plants that are left untreated.

Strategies for delaying insect pest resistance to cotton and maize expressing *Bt* Cry toxins were implemented from the introduction of these transgenes in 1996 and have so far proven to be effective in the US and other developed countries. In contrast, *Pectinophora gossypiella* from India and China has been shown to develop resistance to *Bt* transgenic cotton [9,10]. We were therefore interested in examining a similar trend in Pakistan, in *H. armigera*, as most of the growers in Pakistan do not follow the HRD strategy. We therefore surveyed the primary cotton growing areas of Pakistan to investigate whether *H. armigera* has developed resistance to the *Bt* toxin Cry1Ac after exposure to *Bt* cotton in the field. We further examined the number genes involved in resistance to Cry1Ac in field collected *H. armigera* and mechanisms involved in resistance to Cry1Ac and chemical insecticides.

## Results

### Toxicity of Insecticides to a Laboratory Susceptible Population and Field Population

Toxicity of chlorpyrifos, profenofos Cry1Ac, indoxacarb and deltamethrin to the laboratory susceptible, Lab-PK was similar (overlapping of 95% FL;  $P > 0.05$ ), but higher for cypermethrin

and abamectin (Table 1). In contrast, the toxicity of spinosad was significantly lower (non-overlapping of 95% FL;  $P < 0.05$ ) than cypermethrin and abamectin but was similar to other insecticides tested (Table 1). The slopes for all insecticides tested against Lab-PK were similar, but more shallow indicating that the response in the laboratory susceptible population to tested insecticides was heterogenous.

The toxicity of all insecticides tested against a field collected population was significantly lower ( $P < 0.05$ ) at G1 compared with Lab PK. The resistance ratios for chlorpyrifos, profenofos, Cry1Ac, cypermethrin, spinosad, indoxacarb, abamectin and deltamethrin were 320-fold, 1110-, 580-, 1950-, 200-, 380, 690, and 40-fold respectively (Table 1). The slopes of the regression lines for the insecticides tested against field population at G1 were significantly steeper for chlorpyrifos, profenofos, Cry1Ac, cypermethrin, indoxacarb, abamectin and deltamethrin compared with Lab-PK, suggesting a homogenous response in the field collected population to these insecticides. The slope of spinosad however was more shallow than other insecticides but it was similar to Lab-PK (Table 1).

The response of *H. armigera* to Cry1Ac collected from various locations was similar; however the highest resistance ratio was obtained for the population collected from Multan (Fig. 1).

**Table 1.** Toxicity of various insecticides to laboratory susceptible (Lab-PK) and field collected populations of *H. armigera*.

| Population                                 | Insecticides | LC <sub>50</sub> (95% FL)<br>( $\mu\text{g/ml}$ ) | Slope $\pm$ SE  | RR <sup>1</sup> | DR <sup>2</sup> | n <sup>3</sup> |
|--------------------------------------------|--------------|---------------------------------------------------|-----------------|-----------------|-----------------|----------------|
| Susceptible                                | Cry1Ac       | 0.58 (0.28–1.20)                                  | 1.07 $\pm$ 0.16 | –               | –               | 240            |
| Susceptible                                | Chlorpyrifos | 0.46 (0.18–0.96)                                  | 1.03 $\pm$ 0.17 | –               | –               | 240            |
| Susceptible                                | Profenofos   | 0.50 (0.20–1.03)                                  | 1.06 $\pm$ 0.17 | –               | –               | 240            |
| Susceptible                                | Cypermethrin | 0.26 (0.12–0.50)                                  | 1.20 $\pm$ 0.17 | –               | –               | 240            |
| Susceptible                                | Spinosad     | 1.45 (0.69–2.79)                                  | 1.13 $\pm$ 0.18 | –               | –               | 240            |
| Susceptible                                | Indoxacarb   | 0.90 (0.48–1.71)                                  | 1.27 $\pm$ 0.17 | –               | –               | 240            |
| Susceptible                                | Abamectin    | 0.23 (0.08–0.54)                                  | 0.85 $\pm$ 0.14 | –               | –               | 240            |
| Susceptible                                | Deltamethrin | 0.42 (0.17–0.78)                                  | 1.27 $\pm$ 0.22 | –               | –               | 240            |
| Field                                      | Cry1Ac       | 335.7 (244.2–477.6)                               | 2.43 $\pm$ 0.31 | 579             | –               | 240            |
| Field                                      | Chlorpyrifos | 148.7 (106.3–217.0)                               | 2.29 $\pm$ 0.27 | 323             | –               | 240            |
| Field                                      | Profenofos   | 557.4 (420.3–734.5)                               | 3.20 $\pm$ 0.46 | 1115            | –               | 240            |
| Field                                      | Cypermethrin | 506.8 (387.7–680.7)                               | 3.28 $\pm$ 0.44 | 1949            | –               | 240            |
| Field                                      | Spinosad     | 284.7 (180.0–484.7)                               | 1.74 $\pm$ 0.30 | 196             | –               | 240            |
| Field                                      | Indoxacarb   | 341.2 (260.8–459.7)                               | 3.08 $\pm$ 0.34 | 379             | –               | 240            |
| Field                                      | Abamectin    | 159.2 (121.3–208.8)                               | 3.15 $\pm$ 0.53 | 692             | –               | 240            |
| Field                                      | Deltamethrin | 16.02 (12.74–20.32)                               | 3.49 $\pm$ 0.45 | 38              | –               | 240            |
| Field-UNSEL (G <sub>0</sub> ) <sup>4</sup> | Cry1Ac       | 19.65 (11.56–33.04)                               | 1.50 $\pm$ 0.22 | 34              | –0.21           | 240            |
| Field-UNSEL (G <sub>0</sub> )              | Chlorpyrifos | 11.75 (7.96–17.83)                                | 2.04 $\pm$ 0.25 | 26              | –0.18           | 240            |
| Field-UNSEL (G <sub>0</sub> )              | Profenofos   | 18.48 (12.30–27.83)                               | 2.05 $\pm$ 0.25 | 37              | –0.25           | 240            |
| Field-UNSEL (G <sub>0</sub> )              | Cypermethrin | 20.07 (12.71–31.48)                               | 1.83 $\pm$ 0.24 | 77              | –0.23           | 240            |
| Field-UNSEL (G <sub>0</sub> )              | Spinosad     | 9.22 (5.76–14.81)                                 | 1.66 $\pm$ 0.23 | 6               | –0.25           | 240            |
| Field-UNSEL (G <sub>0</sub> )              | Indoxacarb   | 8.07 (4.04–14.37)                                 | 1.29 $\pm$ 0.20 | 9               | –0.27           | 240            |
| Field-UNSEL (G <sub>0</sub> )              | Abamectin    | 9.27 (5.88–14.79)                                 | 1.77 $\pm$ 0.24 | 40              | –0.21           | 240            |
| Field-UNSEL (G <sub>0</sub> )              | Deltamethrin | 1.76 (1.14–2.61)                                  | 1.90 $\pm$ 0.30 | 4               | –0.16           | 240            |

<sup>1</sup>Resistance ratio = LC<sub>50</sub> of field and unselected (UNSEL) population  $\div$  LC<sub>50</sub> of Lab-PK.

<sup>2</sup>Decline in resistance = Log<sub>10</sub> (initial LC<sub>50</sub>–final LC<sub>50</sub>)  $\div$  number of generation the population of unexposed to toxicant.

<sup>3</sup>The number of larvae exposed to toxins in bioassays including controls.

<sup>4</sup>Generations.

doi:10.1371/journal.pone.0047309.t001

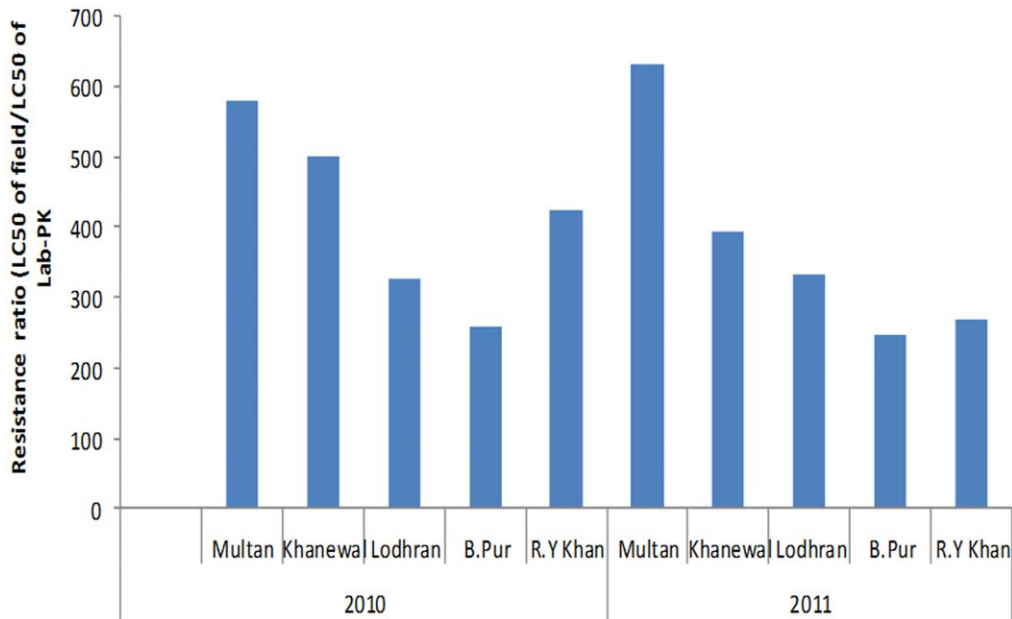

**Figure 1. Effect of Cry1Ac on development of resistance in *H. armigera* collected from different areas of Pakistan.**  
doi:10.1371/journal.pone.0047309.g001

#### Response to Selection and Cross-resistance in Cry1Ac-SEL Population

Mortality at different selection doses of 300, 500 and 1000  $\mu\text{g AI mL}^{-1}$ , determined after 7 days exposure to Cry1Ac were 59, 35, 15 and 40% respectively. Selection of the field population with Cry1Ac from G1 to G5 increased the resistance ratio (RR) to 160-

fold for Cry1Ac compared with the Unselected field population. However, when it was compared with Lab-PK, the RR increased from 580-fold to 5440-fold (just five generations of selection). Similarly, selection with Cry1Ac also increased RR for deltamethrin, chlorpyrifos, profenofos, cypermethrin, spinosad, indoxa-

**Table 2. Cross-resistance and instability pattern in a Cry1Ac-selected (Cry1Ac-SEL) population of *H. armigera*.**

| Population                                | Insecticides | LC <sub>50</sub> (95% FL)<br>( $\mu\text{g/ml}$ ) | Slope $\pm$ SE  | RR <sup>1</sup> | RR <sup>2</sup> | DR <sup>3</sup> | n <sup>4</sup> |
|-------------------------------------------|--------------|---------------------------------------------------|-----------------|-----------------|-----------------|-----------------|----------------|
| Cry1Ac-SEL (G <sub>5</sub> ) <sup>5</sup> | Cry1Ac       | 3154 (2548–4000)                                  | 3.65 $\pm$ 0.47 | 5438            | 160             | –               | 240            |
| Cry1Ac-SEL (G <sub>6</sub> )              | Chlorpyrifos | 1220 (957.3–1585)                                 | 3.28 $\pm$ 0.39 | 2652            | 104             | –               | 240            |
| Cry1Ac-SEL (G <sub>6</sub> )              | Profenofos   | 1421 (998.8–2022)                                 | 2.31 $\pm$ 0.28 | 2842            | 77              | –               | 240            |
| Cry1Ac-SEL (G <sub>6</sub> )              | Cypermethrin | 2557 (2093–3164)                                  | 4.06 $\pm$ 0.50 | 9834            | 127             | –               | 240            |
| Cry1Ac-SEL (G <sub>6</sub> )              | Spinosad     | 533.3 (322.2–836.6)                               | 1.88 $\pm$ 0.30 | 368             | 58              | –               | 240            |
| Cry1Ac-SEL (G <sub>6</sub> )              | Indoxacarb   | 2779 (2293–3424)                                  | 4.24 $\pm$ 0.51 | 3088            | 344             | –               | 240            |
| Cry1Ac-SEL (G <sub>6</sub> )              | Abamectin    | 306.4 (222.1–430.4)                               | 2.52 $\pm$ 0.31 | 1332            | 33              | –               | 240            |
| Cry1Ac-SEL (G <sub>6</sub> )              | Deltamethrin | 52.28(36.71–89.46)                                | 2.79 $\pm$ 0.41 | 125             | 18              | –               | 240            |
| Cry1Ac-UNSEL(G <sub>10</sub> )            | Cry1Ac       | 199.2 (141.6–275.7)                               | 2.36 $\pm$ 0.35 | 343             | 10              | –0.30           | 240            |
| Cry1Ac-UNSEL(G <sub>10</sub> )            | Chlorpyrifos | 93.20 (64.45–135.9)                               | 2.17 $\pm$ 0.28 | 203             | 8               | –0.28           | 240            |
| Cry1Ac-UNSEL(G <sub>10</sub> )            | Profenofos   | 98.61 (65.18–147.4)                               | 2.03 $\pm$ 0.25 | 197             | 5               | –0.29           | 240            |
| Cry1Ac-UNSEL(G <sub>10</sub> )            | Cypermethrin | 204.6 (153.5–268.9)                               | 2.96 $\pm$ 0.40 | 787             | 10              | –0.27           | 240            |
| Cry1Ac-UNSEL(G <sub>10</sub> )            | Spinosad     | 69.11 (44.33–105.4)                               | 1.81 $\pm$ 0.27 | 48              | 7               | –0.22           | 240            |
| Cry1Ac-UNSEL(G <sub>10</sub> )            | Indoxacarb   | 111.8 (70.27–162.5)                               | 1.99 $\pm$ 0.32 | 124             | 14              | –0.35           | 240            |
| Cry1Ac-UNSEL(G <sub>10</sub> )            | Abamectin    | 50.38 (34.99–71.88)                               | 2.26 $\pm$ 0.31 | 219             | 5               | –0.20           | 240            |
| Cry1Ac-UNSEL(G <sub>10</sub> )            | Deltamethrin | 10.04 (7.85–12.89)                                | 3.59 $\pm$ 0.44 | 24              |                 |                 |                |

<sup>1</sup>Resistance ratio = LC<sub>50</sub> of Cry1Ac-SEL and unselected (UNSEL) populations  $\div$  LC<sub>50</sub> of Lab-PK.

<sup>2</sup>Resistance ratio = LC<sub>50</sub> of Cry1Ac-SEL and Cry1Ac unselected populations  $\div$  LC<sub>50</sub> of UNSEL (Table 1).

<sup>3</sup>Decline in resistance =  $\text{Log}_{10}$  (initial LC<sub>50</sub>– final LC<sub>50</sub>)  $\div$  number of generation the population of unexposed to toxicant.

<sup>4</sup>The number of larvae exposed to toxins in bioassays including controls.

<sup>5</sup>Generations.

doi:10.1371/journal.pone.0047309.t002

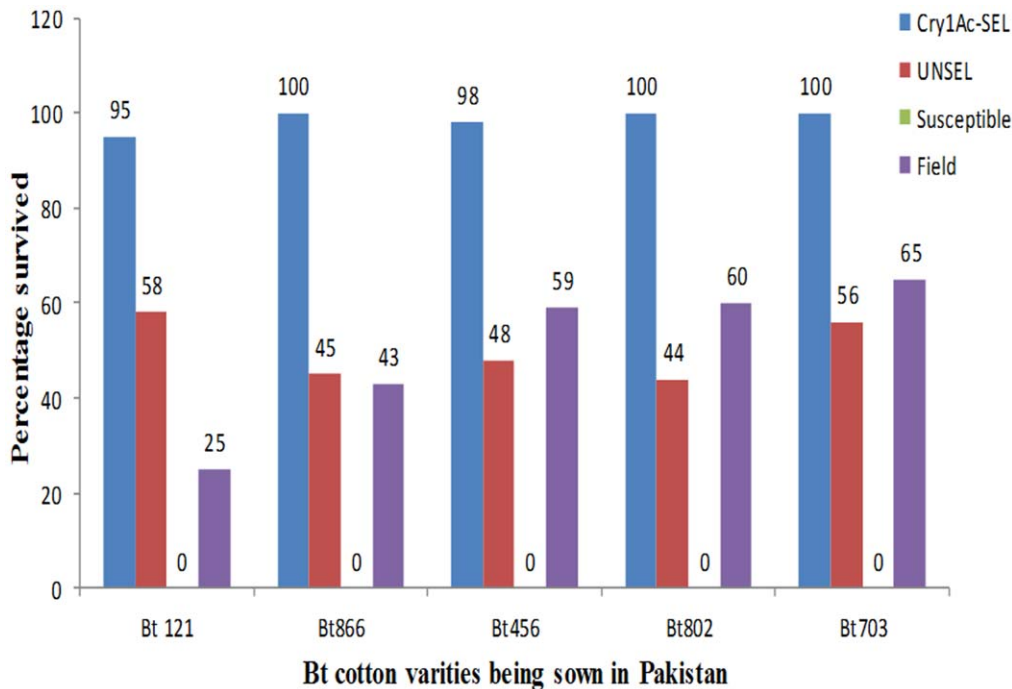

**Figure 2. Survival of Cry1Ac-SEL, UNSEL and Lab-PK on different Bt cotton varieties being sown in different parts of Pakistan.**  
doi:10.1371/journal.pone.0047309.g002

carb, abamectin to 125-fold, 650-, 2840-, 9830-, 370-, 3090- and 1330-fold, compared with Lab-PK (Table 2).

Selection with Cry1Ac also increased the slope for the probit line for the Cry1Ac-SEL population compared with the field population at G<sub>1</sub>. The slope for the insecticides tested against Cry1Ac-SEL also increased significantly indicating increase in homogeneity in the selected population.

The bioassays on various Bt cotton varieties revealed that the survival of Cry1Ac-SEL population was almost 100% on all varieties which was significantly higher than any other strain tested (Fig. 2). In contrast, 100% mortality was obtained with the Lab-PK population while the UNSEL and field population response was similar among varieties (Fig. 2).

### Reversion of Resistance to Cry1Ac and Other Insecticides in Field and Cry1Ac-SEL Populations

In order to investigate the stability of resistance to Cry1Ac and other insecticides in field populations and Cry1Ac-SEL, Cry1Ac-SEL was maintained for 6 generations without exposure to insecticides. Bioassays of field populations at G<sub>5</sub> showed a significant reduction ( $P < 0.05$ ) in resistance ratio with a reversion rate of  $-0.21$ . Similarly, rearing field population without exposure to insecticides also reduced ratios for chlorpyrifos, profenofos, cypermethrin, spinosad, indoxacarb and abamectin (Table 1). The reversion rate of resistance to deltamethrin in the field population was the least ( $-0.16$ ) while it was the highest for indoxacarb ( $-0.27$ ; Table 1).

The Cry1Ac-SEL population was also monitored for reversion of resistance to deltamethrin and other insecticides for four generations (G<sub>7</sub>–G<sub>10</sub>). Bioassays carried out at G<sub>11</sub> indicated that resistance to Cry1Ac declined significantly ( $P < 0.05$ ) in four generations, near the level of field evolved resistance. Likewise, resistance to chlorpyrifos, profenofos, cypermethrin, spinosad, indoxacar, abamectin and deltamethrin was also reduced significantly from G<sub>6</sub> to G<sub>10</sub>. The rate of decline of resistance in

Cry1Ac-SEL population was similar to the reversion rate for the field selected population.

The parameter R is used to estimate response to selection (Falconer, 1989) which can also be applied to determine the number of generations required to a 10-fold change in resistance. The inverse of R is the number of generations required for a 10-fold change in LC<sub>50</sub>. The R value for Cry1Ac is 0.21 suggesting that only five generations are required to increase 10-fold resistance to Cry1Ac.

### Inheritance of Cry1Ac Resistance

The LC<sub>50</sub> of Cry1Ac for Cry1Ac-SEL population was over 3000-fold which was significantly higher than LC<sub>50</sub> of Cry1Ac for Lab-PK. Estimated LC<sub>50</sub> for F<sub>1</sub> female progeny from reciprocal crosses were 105 µg/ml (Cry1Ac-SEL female × Lab-PK male) and 81g µg/ml (Lab-PK female × Cry1Ac-SEL male). The LC<sub>50</sub> values and mean slopes for the concentration mortality line did not differ

**Table 3. Inheritance of resistance to Cry1Ac in a Cry1Ac-SEL population of *H. armigera*.**

| population                                | LC <sub>50</sub> (95% FL)<br>(µg/ml) | Slope ± SE  | D <sub>LC</sub> <sup>1</sup> |
|-------------------------------------------|--------------------------------------|-------------|------------------------------|
| Cry1Ac-SEL (G <sub>6</sub> ) <sup>2</sup> | 3154 (2548–4000)                     | 3.65 ± 0.47 | –                            |
| Lab-PK                                    | 0.58 (0.28–1.20)                     | 1.07 ± 0.16 | –                            |
| Cry1Ac-SEL ♀ × Lab-PK ♂                   | 105.5(70.69–163.0)                   | 1.76 ± 0.21 | 0.60                         |
| Lab-PK ♀ × Cry1Ac-SEL ♂                   | 81.21(52.19–129.3)                   | 1.56 ± 0.20 | 0.57                         |
| F <sub>1</sub> × Cry1Ac-SEL               | 2.68(1.86–4.10)                      | 0.98 ± 0.23 | –                            |

<sup>1</sup>Degree of dominance at LC<sub>50</sub>, which was calculated as described previously [24].

<sup>2</sup>Generations.

doi:10.1371/journal.pone.0047309.t003

significantly between F<sub>1</sub> progenies of the reciprocal crosses between Lab-PK and Cry1Ac-SEL suggesting that the inheritance of resistance to Cry1Ac was autosomal; neither maternal effects nor sex linkages were evident (Table 3). The degree of dominance (D<sub>LC</sub>) for the reciprocal crosses was 0.60 for F<sub>1</sub> (Cry1Ac-SEL female × Lab-PK male) and 0.57 for F<sub>1</sub> (Lab-PK female × Cry1Ac-SEL male), indicating incomplete dominance of resistance to Cry1Ac in Cry1Ac-SEL population.

Pooled F<sub>1</sub> progeny were backcrossed to the Lab-PK colony, resulting in a slope of 0.98; this is similar to Lab-PK but about 4-fold less than the estimated slope for Cry1Ac-SEL, about 2-fold less than F<sub>1</sub> progeny indicate decreased genetic variance in the backcrossed progeny compared with F<sub>1</sub> progeny. The decreased genetic variance indicates the number of loci with major effect on resistance to Cry1Ac was very low. Similarly the direct test for a monogenic mode of inheritance of resistance, which is based on the goodness of fit  $\chi^2$  between the F<sub>1</sub>, backcross and the Lab-PK expected values, calculated as described by Sokal and Rohlf [11] also suggest involvement of one locus with the resistance. As the monogenic model showed insignificant deviation ( $P > 0.05$ ) between observed and expected mortality at seven (Table 3). Likewise, calculation of the minimum number of independently

segregating loci with equal and additive contributions to resistance had given an estimate of 0.54, which also supported the conclusion that resistance was conferred by a single locus.

### Resistance to Insecticides is Inhibited by Synergists

The synergistic effects of PBO and DEF on Cry1Ac and other insecticides were determined in Lab-PK and Cry1Ac-SEL populations of *H. armigera*. The monooxygenase specific inhibitor PBO showed 273-fold synergism to Cry1Ac in the Cry1Ac-SEL population at G6; however, no synergism was observed for Lab-PK (Table 4). Only a 2-fold level of resistance remained after the application of PBO and Cry1Ac together, suggesting that the major mechanism was associated with mono-oxygenases or esterases since PBO has also been shown to inhibit the activity of esterases [12]. When the esterase specific inhibitor DEF was used, a high level of synergism (73-fold) was observed against the Cry1Ac-SEL population but no effect of DEF was detected in Lab-PK (Table 4). The occurrence of synergism for both inhibitors suggests that enhanced activities of esterases, or probably mono-oxygenases, are involved in resistance to Cry1Ac in *H. armigera*.

Similarly, when insecticides like profenofos and indoxacarb were used in a mixture with either PBO or DEF against Cry1Ac-SEL population, a high level of synergism was observed but there was no effect of inhibitors on Cry1Ac toxicity against Lab-PK. The most intriguing observation was synergism of PBO or DEF with Cry1Ac against Cry1Ac-SEL population (Table 4).

### Discussion

Our data suggest that *H. armigera* has developed resistance to Cry1Ac in the field in Pakistan. In Pakistan illegal planting of *Bt* cotton has occurred since 1999, without following the HRD strategy. Previous studies from India and China had reported field evolved resistance to Cry1Ac in *Pectinophora gossypiella* [9,13]. In the present study, our data show a high level of resistance, not only to Cry1Ac, but also to conventional insecticides such as pyrethroids and organophosphates. To confirm whether the resistance to Cry1Ac and conventional insecticides was associated with the same mechanism of resistance, selection experiments were performed in the laboratory with Cry1Ac on a field collected population. After six generations of selection, resistance to Cry1Ac increased significantly (non-overlapping of 95% FL). Cross-resistance patterns in Cry1Ac-SEL could result from enzymes such as metabolic enzymes [8,12] and mutation at an insecticidal target site [3]. The high level of resistance shown by the Cry1Ac-SEL population suggests either a common mechanism affecting these insecticides or genetically linked independent mechanisms for Bt toxin Cry1Ac and deltamethrin. The findings of the present study are similar to previously reported results of *Plutella xylostella* resistance to deltamethrin, which showed a high level of reciprocal cross-resistance to Cry1Ac [8]. Similarly, our data also suggest that the resistance to Cry1Ac in the selected population was due to involvement of metabolic enzymes as was previously shown for *P. xylostella* [8] or *H. armigera* [12]. The metabolic enzymes have several isoenzymes that can act on different insecticides; if an insecticide selects some isoenzymes that can affect different insecticides then cross-resistance is possible [14]. When PBO, mono-oxygenase or esterases inhibitor or DEF esterases inhibitors were used in combination with Cry1Ac or deltamethrin, the resistance to both toxicants was reduced significantly suggesting that the major mechanism of resistance to Cry1Ac or deltamethrin was associated with esterases. We also carried out bioassays with profenofos and indoxacarb in the presence of PBO or DEF and the data suggest that the resistance to the insecticides was

**Table 4.** Susceptibility of Cry1Ac-selected (Cry-SEL) populations of *H. armigera* to Cry1Ac and other insecticides tested in the presence or absence of a PBO or DEF.

| Population | Treatment          | LC <sub>50</sub> (95% FL) | Slope ± SE | RR <sup>1</sup> | SR <sup>2</sup> |
|------------|--------------------|---------------------------|------------|-----------------|-----------------|
| Lab-PK     | Cry1Ac             | 0.58 (0.28–1.20)          | 1.07±0.16  | –               | –               |
|            | Cry1Ac+ PBO        | 0.50 (0.39–1.50)          | 3.09±0.46  | –               | 1               |
|            | Cry1Ac+ DEF        | 0.48(0.12–1.34)           | 1.44±0.23  | –               | 1               |
|            | Profenofos         | 0.50 (0.20–1.03)          | 1.06±0.17  | –               | –               |
|            | Profenofos+ PBO    | 0.98(0.52–1.60)           | 1.58±0.24  | –               | 1               |
|            | Profenofos+ DEF    | 0.44(0.15–0.95)           | 1.01±0.17  | –               | 1               |
|            | Indoxacarb         | 0.90 (0.48–1.71)          | 1.27±0.17  | –               | –               |
|            | Indoxacarb+ PBO    | 1.05 (0.62–3.10)          | 3.54±0.49  | –               | 1               |
|            | Indoxacarb+ DEF    | 1.29 (0.81–2.44)          | 1.79±0.27  | –               | 1               |
|            | Deltamethrin       | 0.42 (0.17–0.78)          | 1.27±0.22  | –               | –               |
|            | Deltamethrin + PBO | 0.14 (0.08–0.43)          | 1.56±0.23  | –               | –               |
|            | Deltamethrin+ DEF  | 0.09 (0.03–0.23)          | 1.23±0.13  | –               | –               |
| Cry1Ac-SEL | Cry1Ac             | 315.4(254.8–540.3)        | 1.65±0.37  | 544             | –               |
|            | Cry1Ac+ PBO        | 1.15(0.56–2.44)           | 1.07±0.15  | 2               | 274             |
|            | Cry1Ac+ DEF        | 4.31(2.80–6.66)           | 1.82±0.27  | 9               | 73              |
|            | Profenofos         | 421(221.8–602.7)          | 2.17±0.29  | 842             | –               |
|            | Profenofos+ PBO    | 1.27(0.76–2.06)           | 1.79±0.27  | 1               | 331             |
|            | Profenofos+ DEF    | 4.85(3.44–6.57)           | 2.82±0.45  | 11              | 87              |
|            | Indoxacarb         | 277.9(122.2–436.7)        | 2.24±0.41  | 309             | –               |
|            | Indoxacarb+ PBO    | 1.25 (0.70–2.27)          | 1.40±0.18  | 1               | 222             |
|            | Indoxacarb+ DEF    | 4.54 (3.14–6.52)          | 2.26±0.31  | 4               | 61              |
|            | Deltamethrin       | 52.3 (36.7–89.5)          | 2.79±0.41  | 125             | –               |
|            | Deltamethrin + PBO | 5.12 (1.32–15.6)          | 1.93±0.23  | 37              | 10              |
|            | Deltamethrin+ DEF  | 3.25 (1.11–11.3)          | 2.12±0.14  | 36              | 16              |

<sup>1</sup>Resistance ratio was LC<sub>50</sub> of Cry1Ac or insecticides for Cry1Ac-SEL ÷ LC<sub>50</sub> of Cry1Ac or insecticides for Lab-PK.

<sup>2</sup>The synergism ratio (SR) was calculated from LC<sub>50</sub> of Cry1Ac or other insecticides tested ÷ LC<sub>50</sub> of Cry1Ac+inhibitor or insecticides+inhibitor.

doi:10.1371/journal.pone.0047309.t004

associated with metabolic enzyme, esterases. The Cry1Ac-SEL population was derived from a field population which was collected from an area where Bt cotton has been grown since 1999. However pyrethroids and neonicotinoids are also being sprayed to control sucking insect pests such as *Bemisia tabaci*, suggesting that *H. armigera* in Pakistan is not only exposed to Bt toxin Cry1Ac but also to conventional insecticides. The common mechanism of resistance to several insecticides as shown by Cry1Ac-SEL, is literally a result of field exposure. Although laboratory experiments cannot completely reflect field conditions, our results are consistent with the fact that the rapid development of resistance to Cry1Ac and deltamethrin observed in field populations was due to exposure to insecticides in the field.

A field collected population was also selected for susceptibility to different insecticides. It was found that after one year of selection in the laboratory for 14 generations, the susceptibility to insecticides increased significantly. The resulting Lab-PK was significantly more susceptible to insecticides than another laboratory population of *H. armigera* from Pakistan with identical bioassay systems to the present studies [5]. The most probable reason for high susceptibility in the Lab-PK population was due to its collection from a non-cotton growing (Islamabad). Resistance alleles, if present at the time of collection, were likely lost due to rearing the pest without exposure to insecticides.

Data obtained on the stability of the mechanism of resistance in the selected or the field collected population suggest instability of resistance as the  $LC_{50}$  decreased significantly in the absence of selection. Rapid reversion of resistance in the Cry1Ac-SEL population and field collected population suggest that high fitness costs may be associated with resistance. The decline in resistance could also be due to the presence of heterozygotes in the selected population. A high level of resistance to conventional insecticides has been reported to decline rapidly in populations selected in the laboratory or in the field [15]. The rapid decline in resistance in the Cry1Ac-SEL population indicates that if the toxin is removed from the field, the resistance could also decline quickly. However, this is unlikely in Pakistan as farmers are maintaining Bt cotton throughout the year as a ratoon crop. This is a serious concern and will likely increase the selection pressure, allowing resistance to rapidly spread to other areas of Pakistan.

Reciprocal crosses between resistant and susceptible populations can provide information on dominance of resistance genes, sex linkage and the number of genes involved in resistance to insecticides. The results of these crosses between Cry1Ac-SEL and Lab-PK showed no significant difference in  $LC_{50}$ s of reciprocal crosses, suggesting that the resistance was autosomal and no sex linkage was observed. Like resistance to deltamethrin and indoxacarb in *Spodoptera litura*, and Cry1Ac, deltamethrin and spinosad resistance in *P. xylostella* from Pakistan, resistance in *H. armigera* was incompletely dominant. The resemblance of genetics of resistance among various compounds could be due to similarity in selection protocols as the selection is carried out with the aim of having about 50% survival of exposed larvae, which could lead to an incompletely dominant mode of inheritance [14]. However the mode of inheritance at a given concentration of insecticide also depends upon the life stage of an insect especially first instars are generally more susceptible than later instars [8,16]. Although we have not carried out assays at first instar but our observations suggest that  $F_1$  progeny of Cry1Ac-SEL was more susceptible at neonate stage than the second instar (the stage which was tested in bioassays). Resistance to insecticides is generally monogenic [17]. The backcrossing of  $F_1$  progeny to parents usually support the estimate the number of genes involved in resistance [18] and the data of the present study suggest that resistance to Cry1Ac in the

Cry1Ac-SEL population is controlled by single gene. The minimum number of effective factors estimated in the present study are less than 1 ( $nE < 1$ ), which also suggests that resistance is controlled primarily by one locus [19].

Stability of resistance and cross-resistance of Cry1Ac to deltamethrin suggest that common resistance mechanism was linked with the failure of two distant pest management control agents against *H. armigera* from Pakistan. Our data show a significant survival of the Cry1Ac-SEL, UNSEL and field collected *H. armigera* on Bt cotton (Fig. 2) suggesting that even small decreases in susceptibility to Cry1Ac could reduce the efficacy of Bt cotton in the field. Based on the field data described above and our bioassay results, we hypothesize that the magnitude of resistance documented here reduces the efficacy of Cry1Ac producing Bt cotton against *H. armigera* in the field. The results on *Pectinophora gossypiella* resistance to Cry1Ac from India and China suggest that the refuge strategy has helped to delay resistance [9]. In contrast our study suggests that field collected population of *H. armigera* survived on Bt cotton. The most probable reasons for the survival are that in Pakistan cotton growers are using Bt cotton varieties which do not have sufficiently high expression of Cry1Ac. Similarly, small land-holding farmers are not using the refuge of non Bt cotton to increase the population of hybrid progeny. Recently due to high cotton prices in the market, growers in Pakistan are keeping the cotton plants through out the year as a ratoon crop which is also exposing *H. armigera* a year around to Bt toxin and thus increasing the chances of resistance development.

Most of the Bt cotton varieties being planted in Pakistan were locally developed. Varieties developed by Monsanto were not approved to grow in Pakistan. While in other countries such as Australia and the US key conditions of the HDR strategy are being met and susceptibility to Cry1Ac has not decreased substantially in the target pests, despite a relatively high initial frequency of resistance [12,13]. The most important option to counter resistance in *H. armigera* is to switch to Bt cotton expressing two toxins, Cry2Ab and Cry1Ac [13]. However, for long-term sustainable IRM, cotton with two or more toxins other than Cry1Ac would be better for countering resistance to Cry1Ac [13]. A second option, which is very unlikely in Pakistani agriculture, is to increase plantings of non-Bt cotton. Finally using other control tactics, such as cultural practices in combination with Bt cotton, could be another option to suppress resistance to Bt and conventional insecticides.

## Materials and Methods

### Insects

*Helicoverpa armigera* larvae were collected from non Bt cotton fields, as the treatment regimes used provide a greater chance for the generation of resistance than the regimes used in vegetables. By pest scouting of fields from five districts, namely Multan, Khanewal, Lodhran, Bahawalpur and Rahim Yar Khan approximately 400 larvae were collected in 2010. No specific permit was required to collect insects from the field as the fields were privately owned and merely by speaking to private owners, collection was made. Since the collection was not involved endangered species therefore no such permission was required from any concerned authority in Pakistan. The areas are in Punjab Province and under multiple cropping systems, with several cultivated crops such as cotton, maize, sorghum, millet, rice, sugarcane, wheat, potato, vegetables, fodder crops and orchards (Fig. 3). These crops are grown side by side, depending on the season. An insecticide-susceptible population, labeled as Lab-PK, was collected from

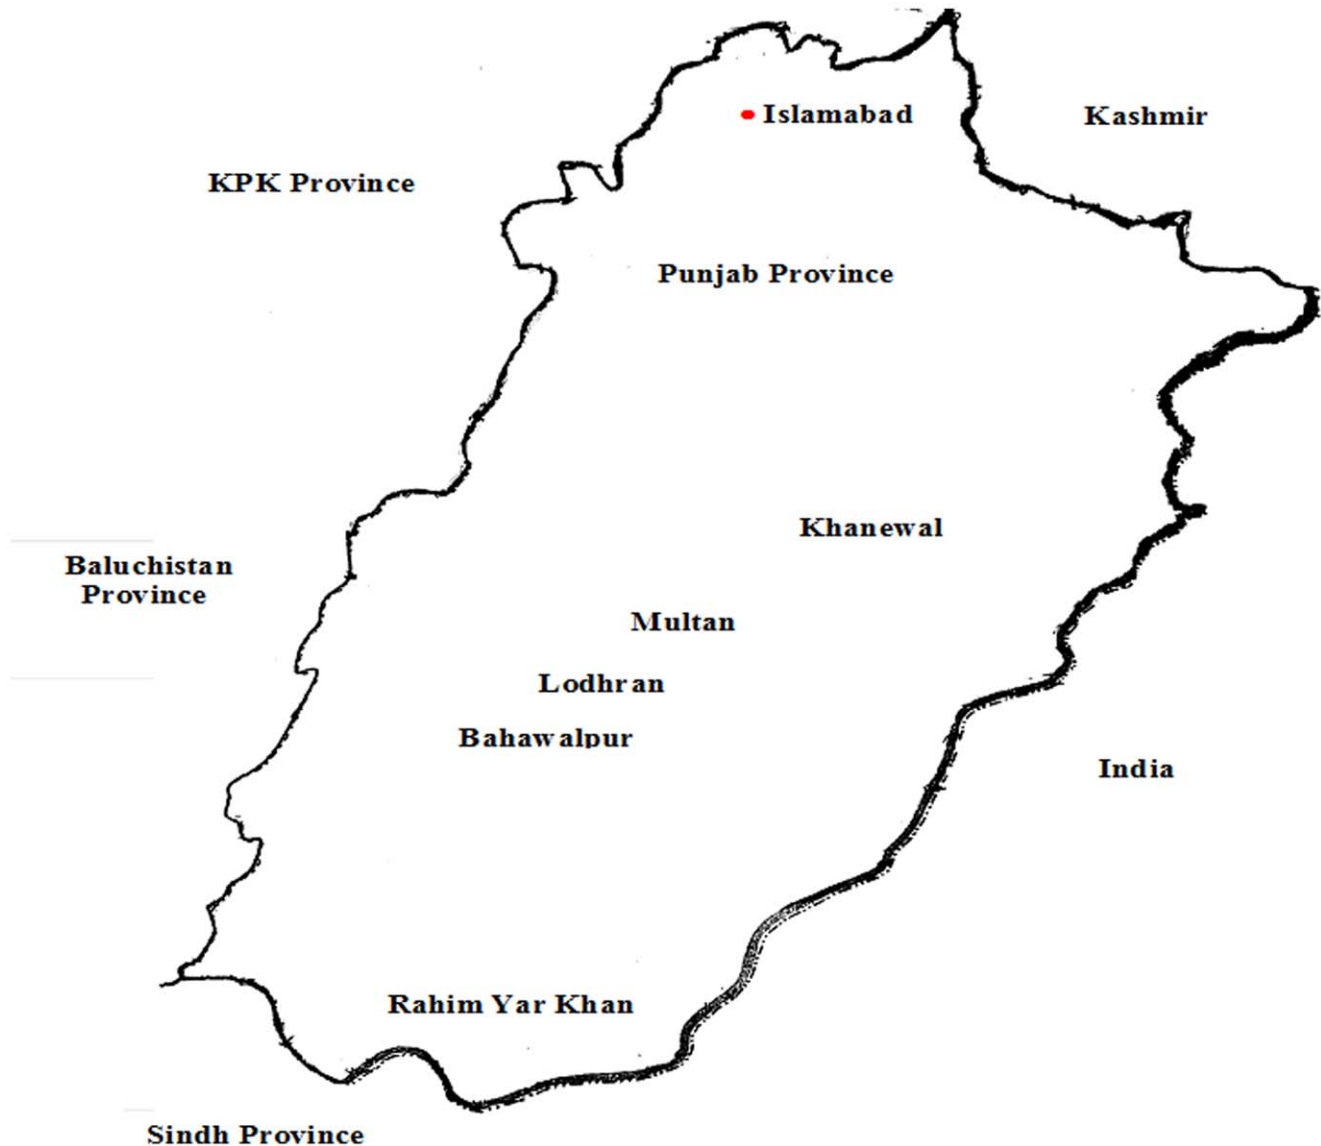

**Figure 3. Sampling site for *H. armigera* from Punjab province, Pakistan.**  
doi:10.1371/journal.pone.0047309.g003

Multan, Punjab province from non Bt cotton field and selected for susceptibility in the laboratory as described previously [14].

Larvae were reared on semi-synthetic wheatgerm-based diet in the laboratory at  $25 \pm 2^\circ\text{C}$  and 60–65% relative humidity with a 14:10 h light : dark photoperiod. Diet was replaced after 24 h, and pupae were collected on alternate days. The adults that emerged were kept in Perspex oviposition cages ( $30 \times 30 \times 30$  cm) with two sides sealed with muslin to maintain ventilation and fed on a solution containing sucrose ( $100 \text{ g L}^{-1}$ ), vitamin solution ( $20 \text{ mL L}^{-1}$ ) and methyl 4-hydroxybenzoate ( $2 \text{ g L}^{-1}$ ) presented on a soaked cotton wool ball.

#### Insecticides

Commercial formulations of the different insecticides used in bioassays included spinosad (Tracers 24SC, Dow Agro-Sciences, UK), indoxacarb (Stewards15SC, DuPont, Pakistan), abamectin (Agrimec TM 1.8EC, Syngenta, UK), cypermethrin  $100 \text{ g L}^{-1}$  EC (Arrivo<sup>®</sup> 10EC; FM, Philadelphia, PA), deltamethrin  $105 \text{ g L}^{-1}$  EC (Decis Super<sup>®</sup> 10.5EC; Bayer Crop Science,

France), Profenofos  $500 \text{ g L}^{-1}$  EC (Curacron<sup>®</sup> 50EC; Syngenta Crop Protection, Switzerland), chlorpyrifos  $400 \text{ g L}^{-1}$  EC (Lorsban<sup>®</sup> 40EC; Dow AgroSciences, UK) and Cry1Ac. The source of Cry1Ac was a lyophilized (freeze-dried) formulation of MVP II containing  $\approx 20\%$  Cry1Ac protoxin of *B. thuringiensis* variety *kurstaki* encapsulated by transgenic *Pseudomonas fluorescens* Migula (Mycogen Corporation, San Diego, CA). It was stored at  $-80^\circ\text{C}$  until used and before use it was allowed to warm at room temperature. Appropriate amounts of the lyophilized material were weighed for each concentration and suspended in distilled water.

#### Bioassays

Second instar *H. armigera* larvae were used for all bioassays, in which the insecticides or Cry1Ac was incorporated into an artificial wheatgerm diet [20]. The Cry1Ac or insecticides were serially diluted with distilled water and then mixed with diet at an appropriate temperature of diet. Toxins incorporated freshly prepared diet was poured into 140-ml plastic Petri-dishes. For

controls, distilled water was mixed with the diet. All assays included seven to eight toxin doses (concentrations) each with three to eight replicates and 30 larvae were placed on each replicate. The Petri-dishes were wrapped black paper to avoid cannibalism [21] and incubated at 27°C, 70% RH, and a photoperiod of 14:10 (L:D) h for 7 d. The *H. armigera* are known to cannibalized however if they are placed in dark place, this behavior can be avoided [21]. Larval mortality and stunting (larvae that failed to molt to third instars) were recorded as response data. Dosage mortality data were analyzed by probit analysis [22].

We used five Bt cotton varieties viz. Bt121, Bt856, Bt456, Bt802 and Bt703, which expressed Cry1Ac to determine survival of field collected, Cry1Ac-SEL, UNSEL and Lab-PK populations on these varieties. These varieties were grown in pots of 45 cm to 30 cm using clay loam soil with farm yard manure as organic fertilizers. The pots were kept in an open field to avoid damage to Cry1Ac as it is an established fact that the expression of toxin declined with the age and also the plants will be less toxic if they are grown in the greenhouse. The five first instar larvae per plant were released on eight weeks old 10 plants of each variety and the larvae were allowed to complete their larval stage. The plants with larvae were placed at 27°C, 70% RH, and a photoperiod of 14:10 (L:D) h.

### Selection with Cry1Ac

The field collected population was divided into two sub-populations. One population was selected with Cry1Ac (Cry1Ac-SEL) while the second population was left unselected (UNSEL) for five generations. The selection was done using three concentrations of MVPII viz 300, 500 and 1000 µg AI mL<sup>-1</sup> and about 300 larvae were used in each round of selection. The larvae were exposed to the toxin for seven days and after exposing the larvae to toxin the survived larvae were reared on freshly prepared diet without toxin until they pupated. Mean survival of larvae after exposure to Cry1Ac concentrations over four generations was 35% for Cry1Ac-SEL.

### Effect of Inhibitors on Pesticides Activities

The toxicities of Cry1Ac, profenofos, indoxacarb and deltamethrin to Cry1Ac-SEL, UNSEL, and Lab-PK populations were determined in the presence of two inhibitors, piperonyl butoxide (PBO; Sigma Ltd, UK), an inhibitor of cytochrome P450 monooxygenases (microsomal oxidases) and of esterases, and *S,S,S*-tri-*n*-butyl phosphorotrithioate (DEF; Sigma Ltd, UK), an esterase-specific inhibitor as described previously [8]. The 10 mg

L<sup>-1</sup> of the inhibitor was added to various concentrations of the pesticides and larvae were exposed as described above. The mortality was recorded after seven days exposure to the pesticides. The synergism ratio (SR) was calculated by dividing the LC<sub>50</sub> of the population treated with pesticide alone by the LC<sub>50</sub> of the strain treated with pesticide plus the inhibitor.

### Genetics of Resistance to Cry1Ac

The response of F1 progeny to Cry1Ac was evaluated in mass reciprocal crosses between Cry1Ac-SEL and laboratory susceptible (Lab-PK) populations. To produce F1, mass crosses using 50 adults of each sex provided enough offspring for multiple-concentration testing and calculation of the 50% lethal concentration (LC50). The degree of dominance for LC50 (DLC) was calculated as described by Sayyed et al [23] and Bourguet *et al.* [24] Backcrossed offspring were obtained from F1 × Lab-PK. This backcross was preferred to F1 × Cry1Ac-SEL because the resistance was incompletely dominant and differed more from Lab-PK than from Cry1Ac-SEL.

### Data Analysis

Mortality data were corrected by Abbott's formula [25] where necessary and analysed by probit analysis [26] using the software POLO-PC [22]. The estimates of LC50 values and their 95% fiducial limits (FL) were obtained by probit analysis using Polo. Because of the inherent variability of bioassays, pair-wise comparisons of LC50 values were made at the 1% significance level where individual 95% FL for two treatments do not overlap [27]. Resistance ratios were determined by dividing the LC50 values of field populations by the LC50 of Lab-PK. Cross-resistance pattern among insecticides was studied with pair-wise correlation co-efficient of LC50 values of the field populations for each insecticide.

### Acknowledgments

These studies were part of PhD work by the first author. The authors are extremely grateful to Prof. Bruce Tabashnik (University of Arizona) and Prof. Denis Wright (Imperial College London) for their valuable comments on the earlier version of the manuscript.

### Author Contributions

Conceived and designed the experiments: AHKA AHS. Performed the experiments: AHKA. Analyzed the data: AHS. Contributed reagents/materials/analysis tools: MN MA. Wrote the paper: AHS.

### References

- King ABS (1994) *Heliothis/Helicoverpa armigera* (Lepidoptera: Noctuidae). In: G. Matthews and J. Tunstall (eds), *Insect Pests of Cotton*. CAB International, Wallingford, UK. 445–446.
- McCaffery AR (1998) Resistance to insecticides in heliothine Lepidoptera: a global view; 1998 Apr 08–09; London, England. 1735–1750.
- Ferre J, Van Rie J (2002) Biochemistry and genetics of insect resistance to *Bacillus thuringiensis*. *Ann Rev Entomol* 47: 501–533.
- Sayyed AH, Wright DJ (2006) Genetics and evidence for an esterase-associated mechanism of resistance to indoxacarb in a field population of diamondback moth (Lepidoptera : Plutellidae). *Pest ManagSci* 62: 1045–1051.
- Ahmad M, Arif MI, Ahmad Z (1995) Monitoring insecticide resistance *Helicoverpa armigera* (Lepidoptera: Noctuidae) in Pakistan. *J Econ Entomol* 88: 771–776.
- french-Constant RH, Daborn PJ, Goff GL (2004) The genetics and genomics of insecticide resistance. *Trend Gen* 20: 163–170.
- Ahmad M, Arif MI, Ahmad Z, Denholm I (2002) Cotton whitefly (*Bemisia tabaci*) resistance to organophosphate and pyrethroid insecticides in Pakistan. *Pest ManagSci* 58: 203–208.
- Sayyed AH, Moores G, Crickmore N, Wright DJ (2008) Cross-resistance between a *Bacillus thuringiensis* Cry toxin and non-Bt insecticides in the diamondback moth. *Pest ManagSci* 64: 813–819.
- Dhurua S, Gujar GT (2011) Field-evolved resistance to Bt toxin Cry1Ac in the pink bollworm, *Pectinophora gossypiella* (Saunders) (Lepidoptera: Gelechiidae), from India. *Pest Manag Sci* 67: 898–903.
- Zhang HN, Yin W, Zhao J, Jin L, Yang YH, et al. (2011) Early warning of cotton bollworm resistance associated with intensive planting of Bt cotton in China. *PLoS ONE* 6: e22874.
- Sokal RR, Rohlf FJ (1981) *Biometry*, 3rd edition. WH Freeman, San Francisco, CA, USA.
- Gunning RV, Dang HT, Kemp FC, Nicholson IC, Moores GD (2005) New resistance mechanism in *Helicoverpa armigera* threatens transgenic crops expressing *Bacillus thuringiensis* Cry1Ac toxin. *Appl Environ Microbiol* 71: 2558–2563.
- Wan P, Huang Y, Wu H, Huang M, Cong S, et al. (2012) Increased frequency of pink bollworm resistance to Bt toxin Cry1Ac in China. *PLoS ONE* 7: e29975.
- Ahmad M, Sayyed AH, Crickmore N, Saleem MA (2007) Genetics and mechanism of resistance to deltamethrin in a field population of *Spodoptera litura* (Lepidoptera : Noctuidae). *Pest ManagSci* 63: 1002–1010.



15. Carriere Y, Dennehy TJ, Pedersen B, Haller S, Ellers-Kirk C, et al. (2001) Large-scale management of insect resistance to transgenic cotton in Arizona: Can transgenic insecticidal crops be sustained? *J Econ Entomol* 94: 315–325.
16. Shad SA, Sayyed AH, Saleem MA (2010) Cross-resistance, mode of inheritance and stability of resistance to emamectin in *Spodoptera litura* (Lepidoptera: Noctuidae) *Pest ManagSci* 66: 839–846.
17. Horowitz AR, Gorman K, Ross G, Denholm I (2003) Inheritance of pyriproxyfen resistance in the whitefly, *Bemisia tabaci* (Q biotype). *Arch Insect Biochem Physiol* 54: 177–186.
18. Tabashnik BE (1991) Determining the mode of inheritance of pesticide resistance with backcross experiments. *J Econ Entomol* 84: 703–712.
19. Lande R (1981) The minimum number of genes contributing to quantitative variation between and within populations *Genetics* 99: 541–553.
20. Sayyed AH, Ahmad M, Crickmore N (2008) Fitness costs limit the development of resistance to indoxacarb and deltamethrin in *Heliothis virescens* (Lepidoptera: Noctuidae). *J Econ Entomol* 101: 1927–1933.
21. Ahmad M, Arif MI, Ahmad Z (1995) Monitoring insecticide resistance of *Helicoverpa armigera* (Lepidoptera, Noctuidae) in Pakistan. *J Econ Entomol* 88: 771–776.
22. LeOra S (2003) Polo Plus a users guide to probit or logit analysis. LeOra Software, Berkeley, CA.
23. Sayyed AH, Haward R, Herrero S, Ferre J, Wright DJ (2000) Genetic and biochemical approach for characterization of resistance to *Bacillus thuringiensis* toxin Cry1Ac in a field population of the diamondback moth, *Plutella xylostella*. *Appl Environ Microbiol* 66: 1509–1516.
24. Bourguet D, Genissel A, Raymond M (2000) Insecticide resistance and dominance levels. *J Econ Entomol* 93: 1588–1595.
25. Abbott SW (1925) A method of computing the effectiveness of an insecticide. *J Econ Entomol* 18: 265–267.
26. Finney D (1971) *Probit analysis*, 3rd ed. Cambridge University Press, Cambridge, United Kingdom.
27. Litchfield JT, Wilcoxon F (1949) A simplified method of evaluating dose-effect experiments. *J Pharmacol Expt The* 99: 99–103.
